# Supplementary material for: Field-validated imaging of decadal and seasonal changes in permafrost bedrock using quantitative electrical resistivity tomography (Zugspitze, Germany/Austria)
Source: Copernicus journal article supplement (doi:10.5194/egusphere-2025-5552), 2025-11-21
Supplement: Supplementary file 1 [file egusphere-2025-5552-supplement.pdf]

ERT settings  
for TERRAMETER LS

NEW TASK

|                    | Hauptstollen | Seitenstollen       |
|--------------------|--------------|---------------------|
| spread             | 2X21S        | 2X21S               |
| protocol           | WEN32SX      | WEN32SX<br>ScNachWe |
| min. el. spacing X | 4.6          | 1.53                |
| min. el. spacing Y | 1            | 1                   |
| min. el. spacing Z | 1            | 1                   |

RECEIVER SETTINGS

|                      |       |
|----------------------|-------|
| measure mode         | RES   |
| min. stacks          | 2     |
| max. stacks          | 4     |
| error limit          | 1 %   |
| delay time           | 0.2 s |
| acq. time            | 0.2 s |
| full Wave Form       | Yes   |
| power line frequency | 50 Hz |

TRANSMITTER SETTINGS

|                        |           |
|------------------------|-----------|
| min. current           | 0.5 mA    |
| max. current           | 50 mA     |
| max. power             | 250 W     |
| max. output volt       | 600 V     |
| electrode test         | Focus One |
| bad electrode          | 600 kΩm   |
| fail electrode         | 600 kΩm   |
| electrode test current | 1 mA      |

Figure S1. ERT settings.

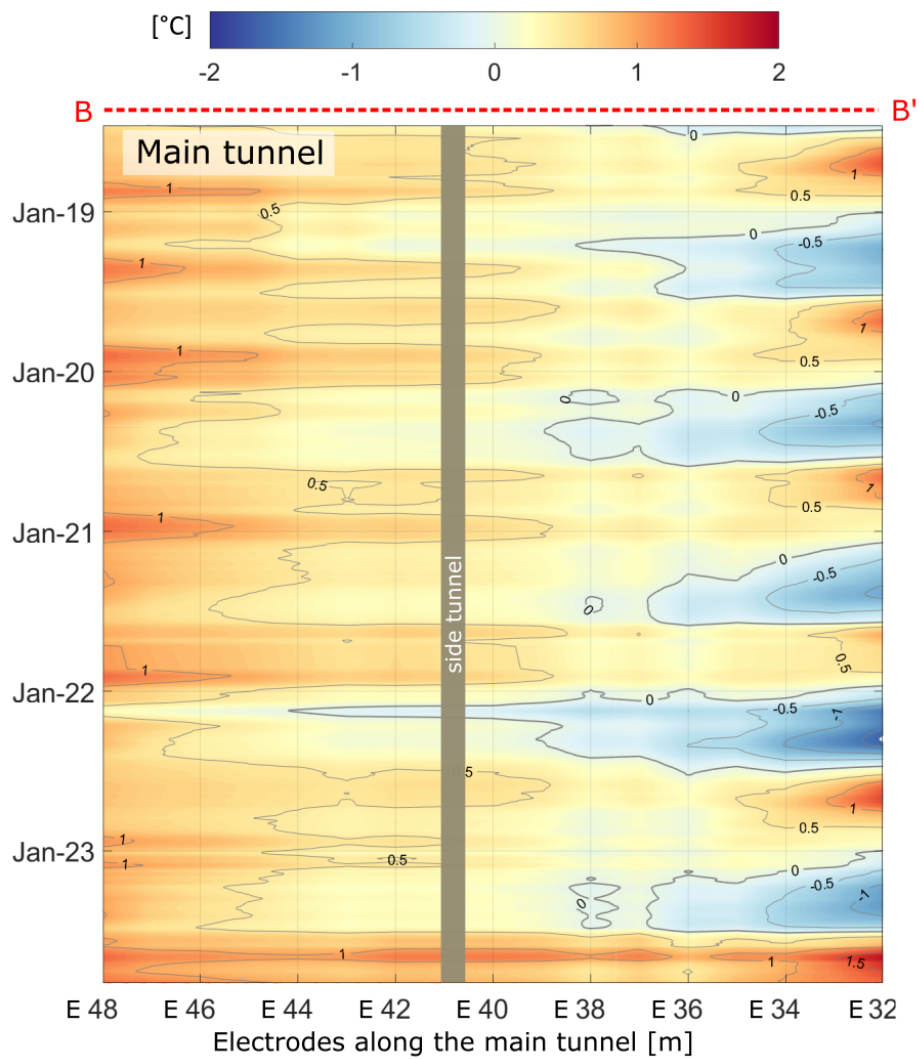

**Figure S2. Temperature profiles B-B' in the side tunnel.** The location of the transect is visible in Fig. 1b.

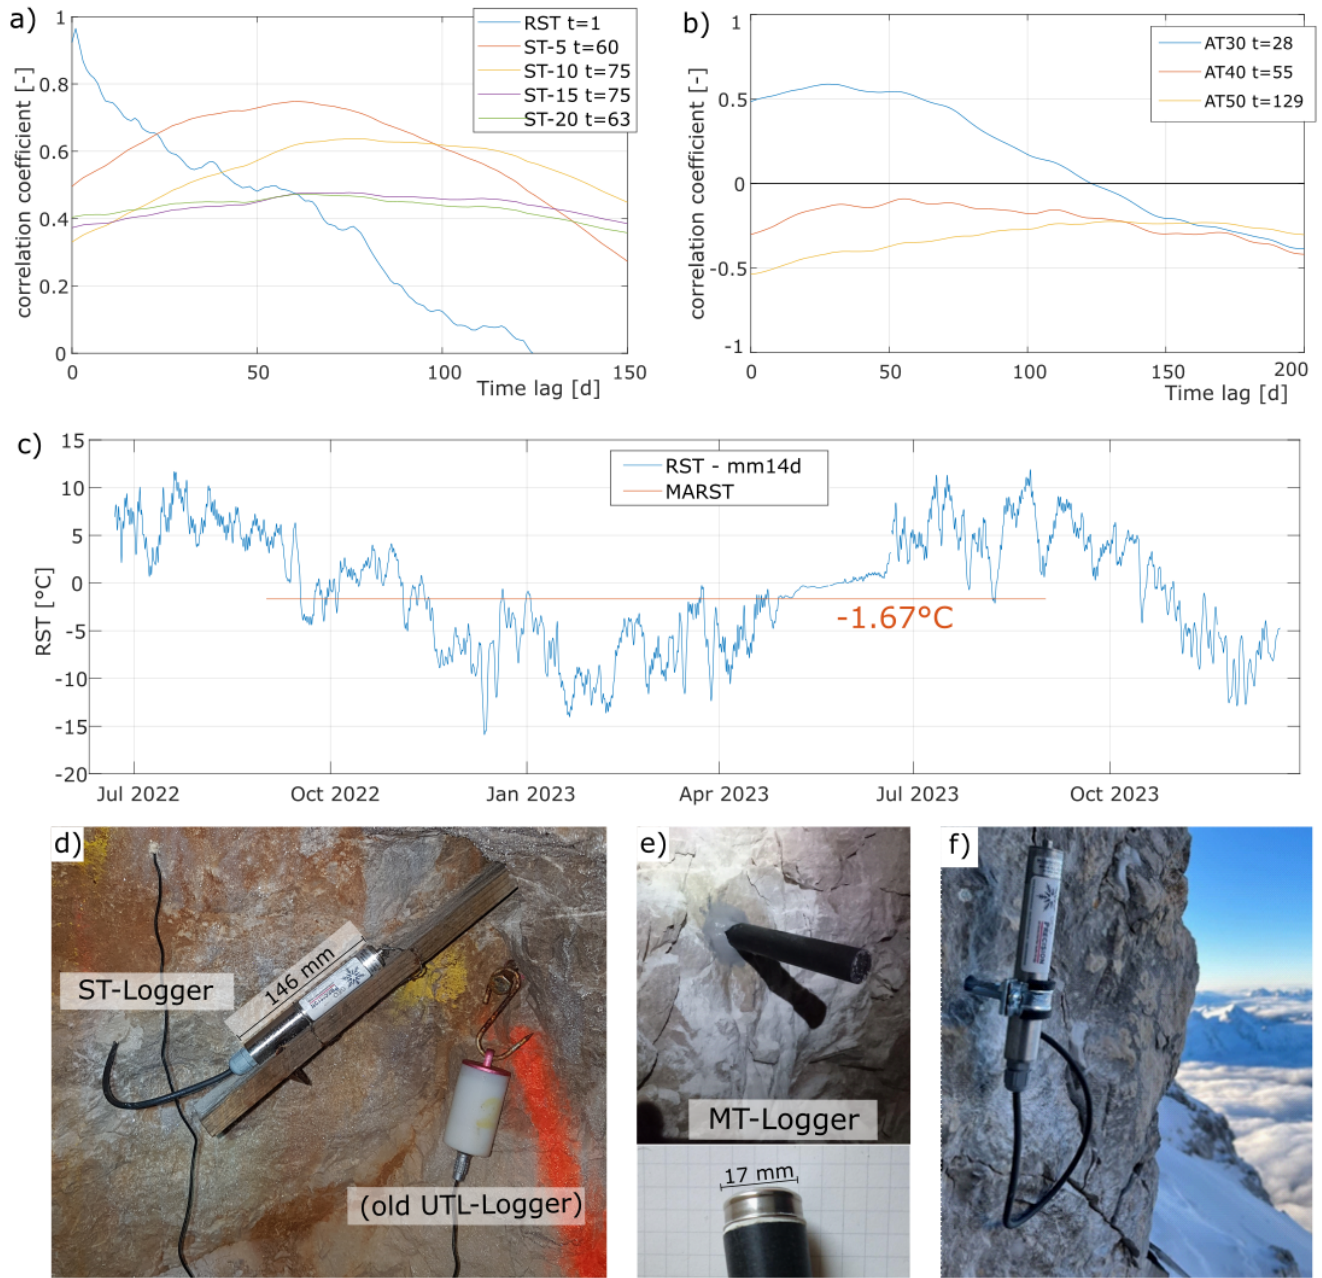

**Figure S3. Extra analysis of tunnel temperatures.** a) Correlation between rock temperatures and the external air temperature, measured at the DWD station. b) Correlation between AT loggers and the DWD air temperature. c) In blue is presented the 2-week moving mean of RST (image d), in red is the mean annual rock surface temperature. d) Photo of the new ST-loggers and the old UTL-loggers. All sensors are located at a depth of 40 cm. The old loggers were replaced in 2019, with a one-year overlapping period. e) Photos of the MT-loggers. All sensors are located at a depth of 40 cm. f) Photo of the RST logger installed on the north face, close to Electrode E30, at 10 cm depth.

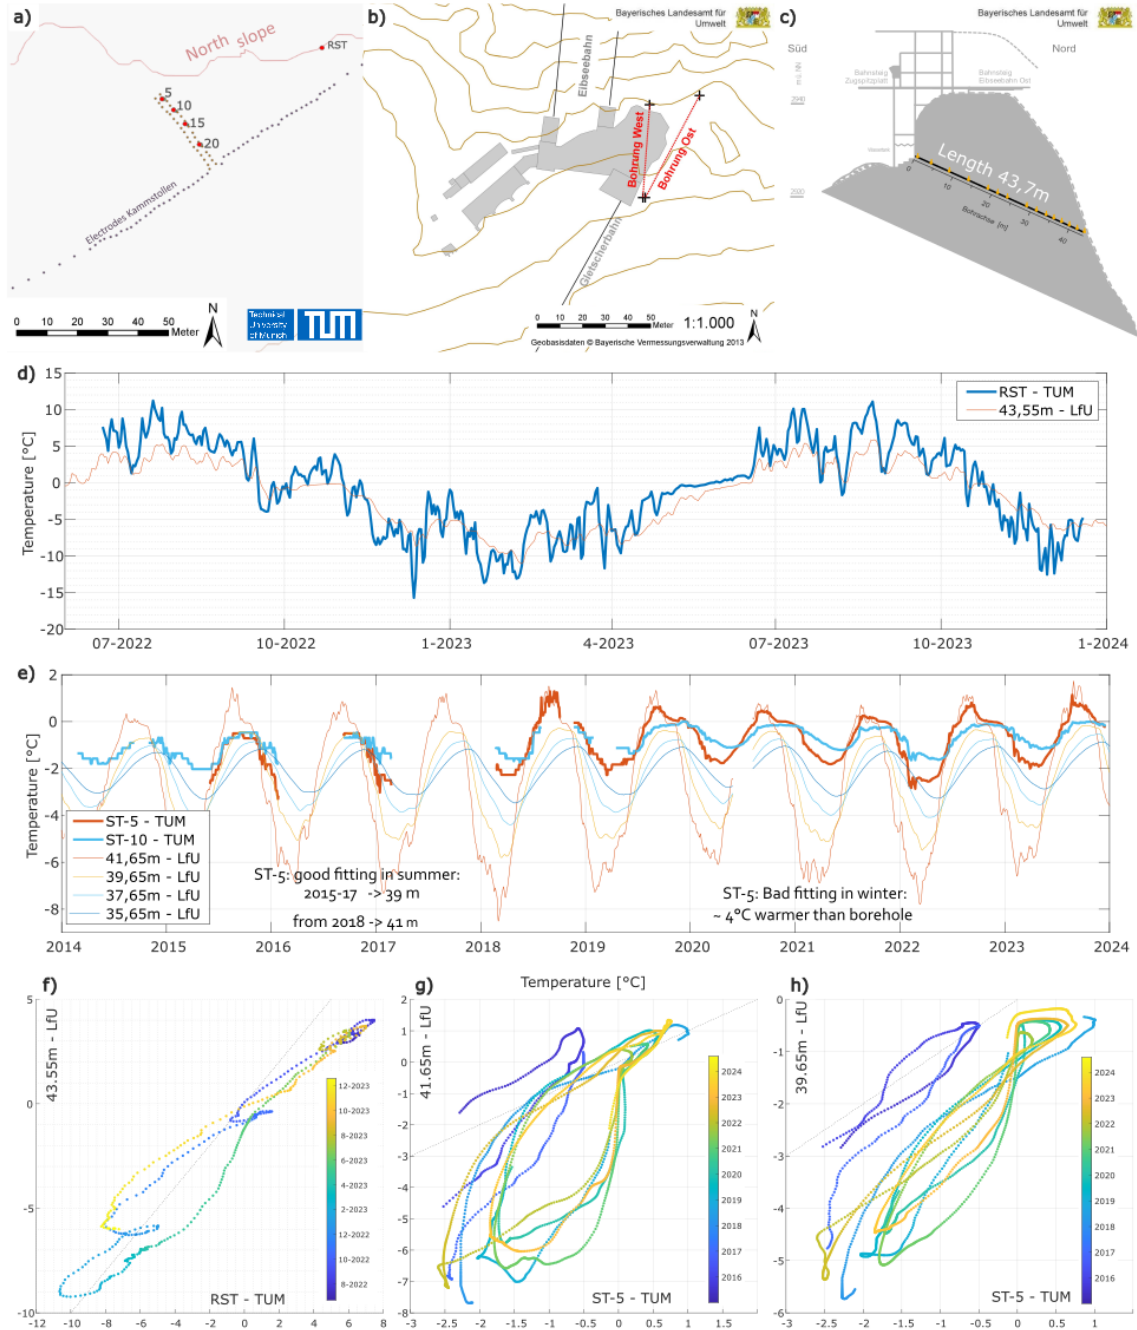

**Figure S4.** Comparison of tunnel temperatures with those from the LfU borehole under the summit station. a) Location of the tunnel loggers. Please note that the numbering starts from the north wall ( $X_{north} = 0m$ ). b)-c) Location of the LfU borehole (modified from Gallemann et al. (2017)). Please note that here the numbering starts from the south wall ( $X_{north} = 43.7m$ ). d)-f) Comparison of the TUM RST logger and the LfU-43m logger. e)-g)-h) Comparison of TUM ST-5/ST-10 logger and LfU-41m/39m logger.

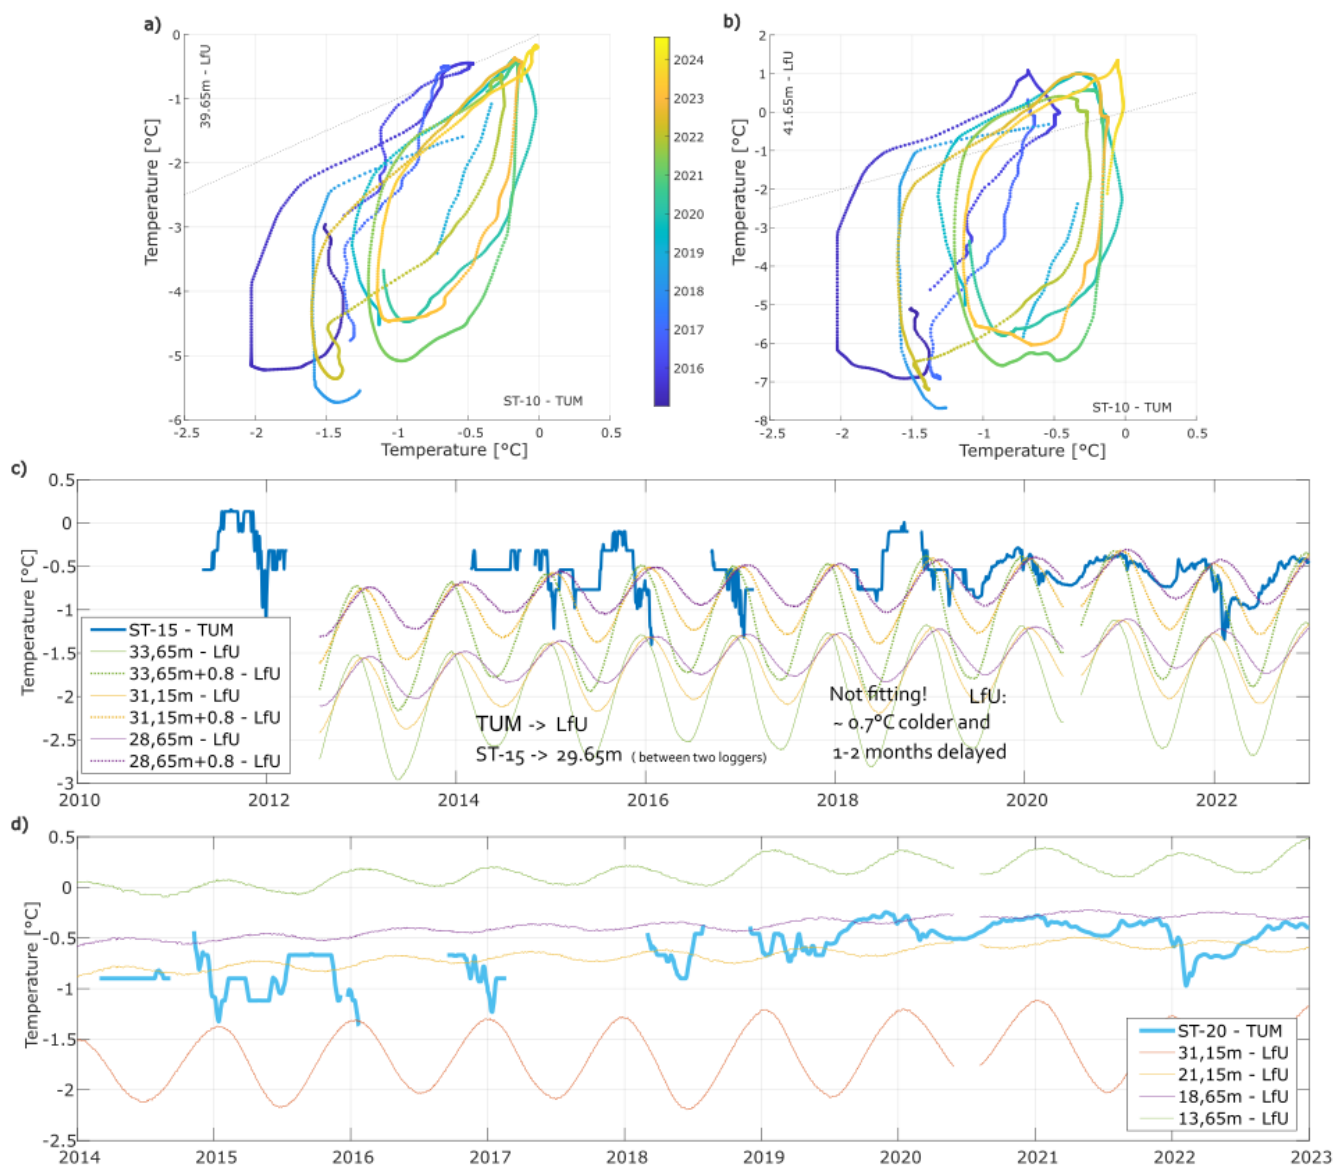

**Figure S5.** Comparison of tunnel temperatures with those from the LfU borehole under the summit station, second part. a)-b) Comparison of ST-10 TUM-logger and LfU-9/41m logger. c) Comparison of TUM ST-15 logger and multiple LfU loggers. d) Comparison of TUM ST-20 logger and multiple LfU loggers.

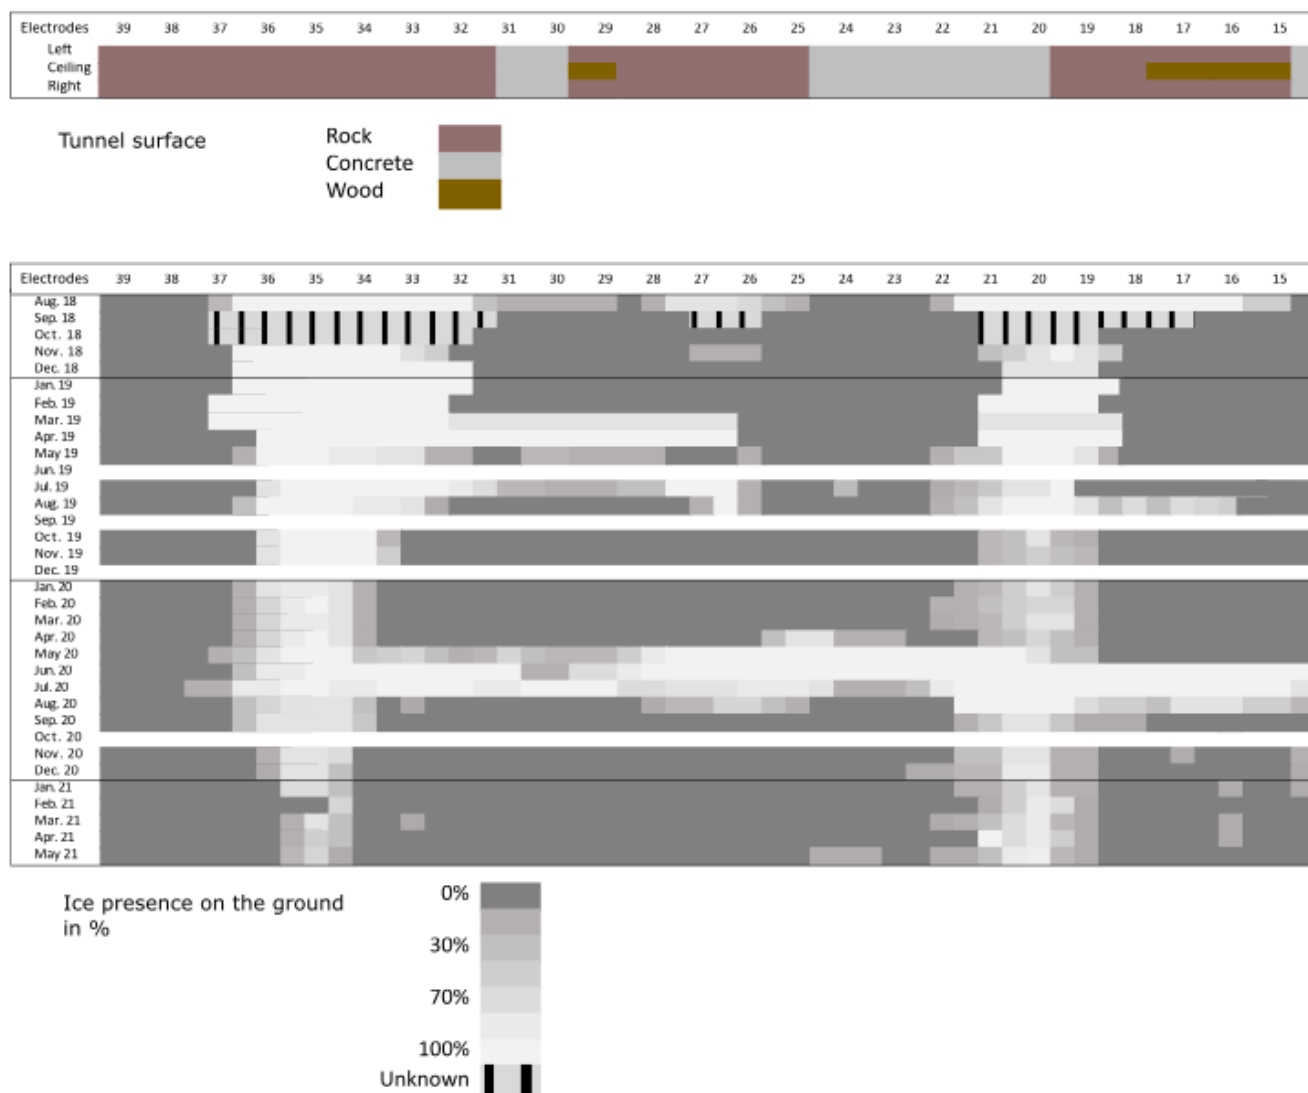

**Figure S6.** Mapping of surface ice in the tunnel. Upper graph: Surface coverage of the tunnel. Lower graph: Percentage of the ground covered by ice.

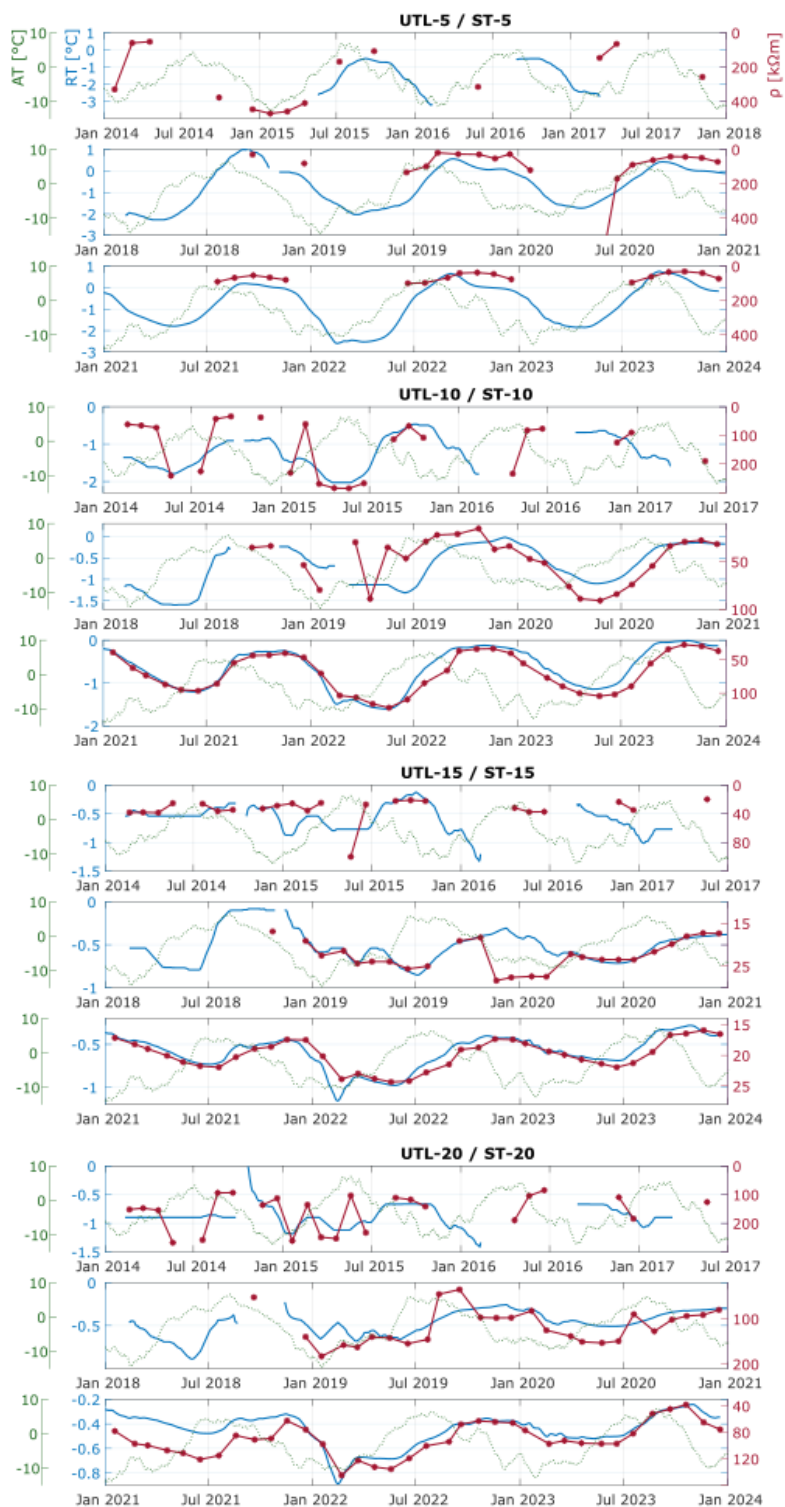

**Figure S7.** Comparison of temperatures and their closest apparent resistivities.

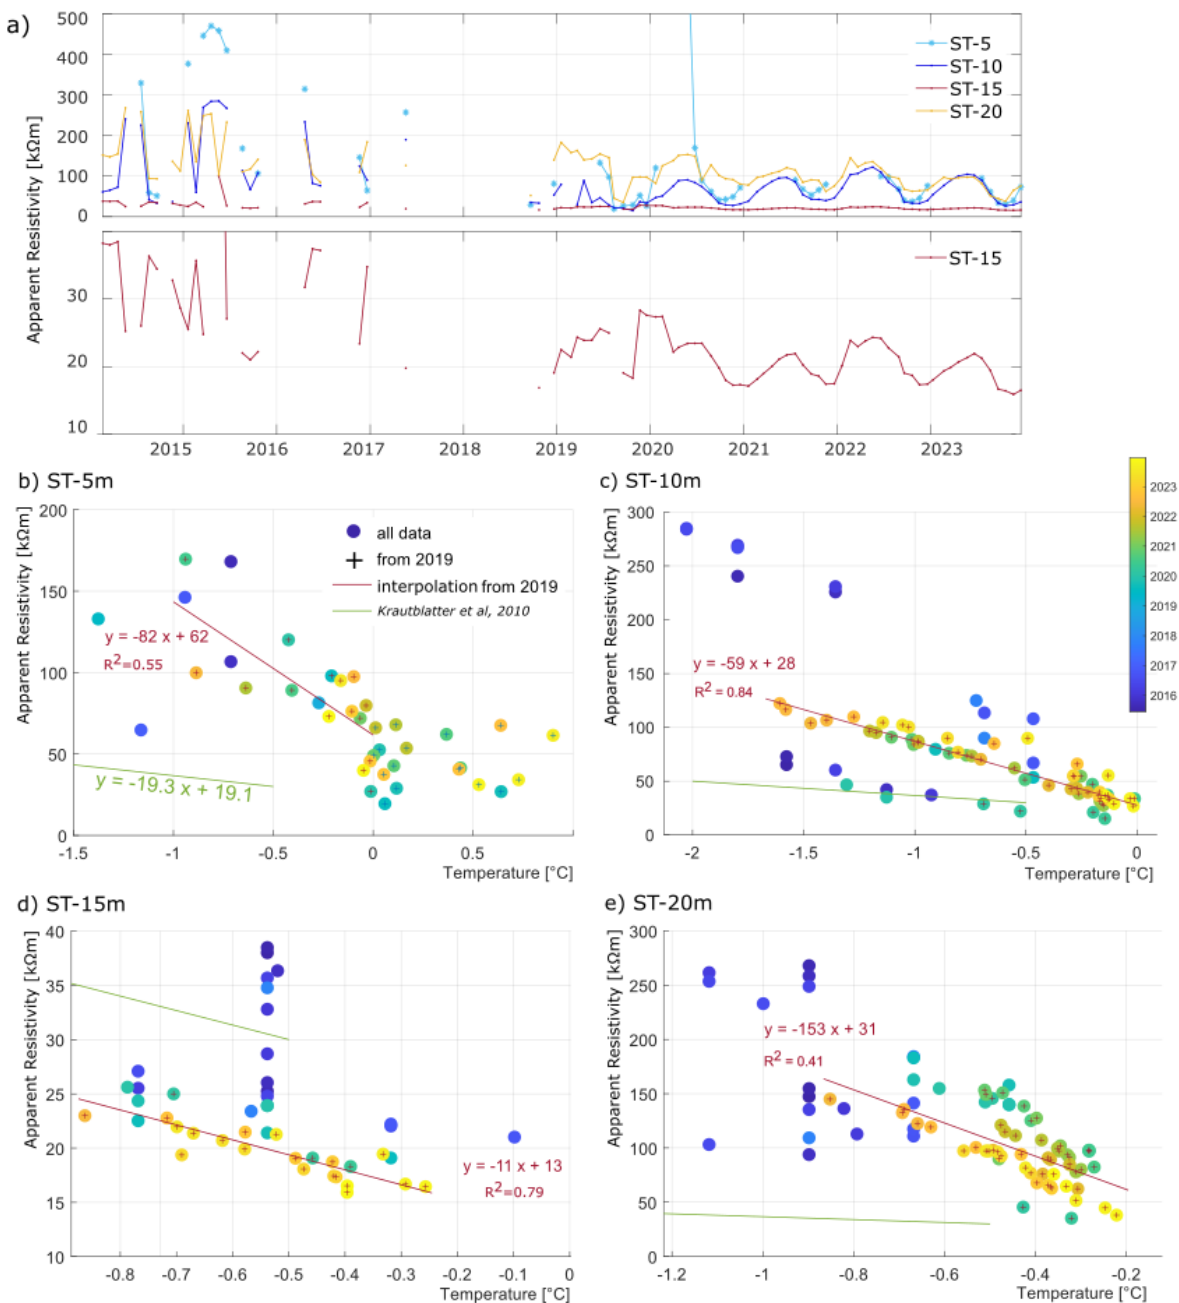

**Figure S8.** Field calibration. a) Apparent resistivity measured at the closest point to the respective ST-Logger. b-e) Correlation between ST-loggers and apparent resistivity. Only measurements from 2019 are included in the interpolation because new temperature loggers have a higher resolution. In red: resulting interpolation line with respective equation and  $R^2$  value. In green, line after the calibration of Krautblatter et al. (2010).

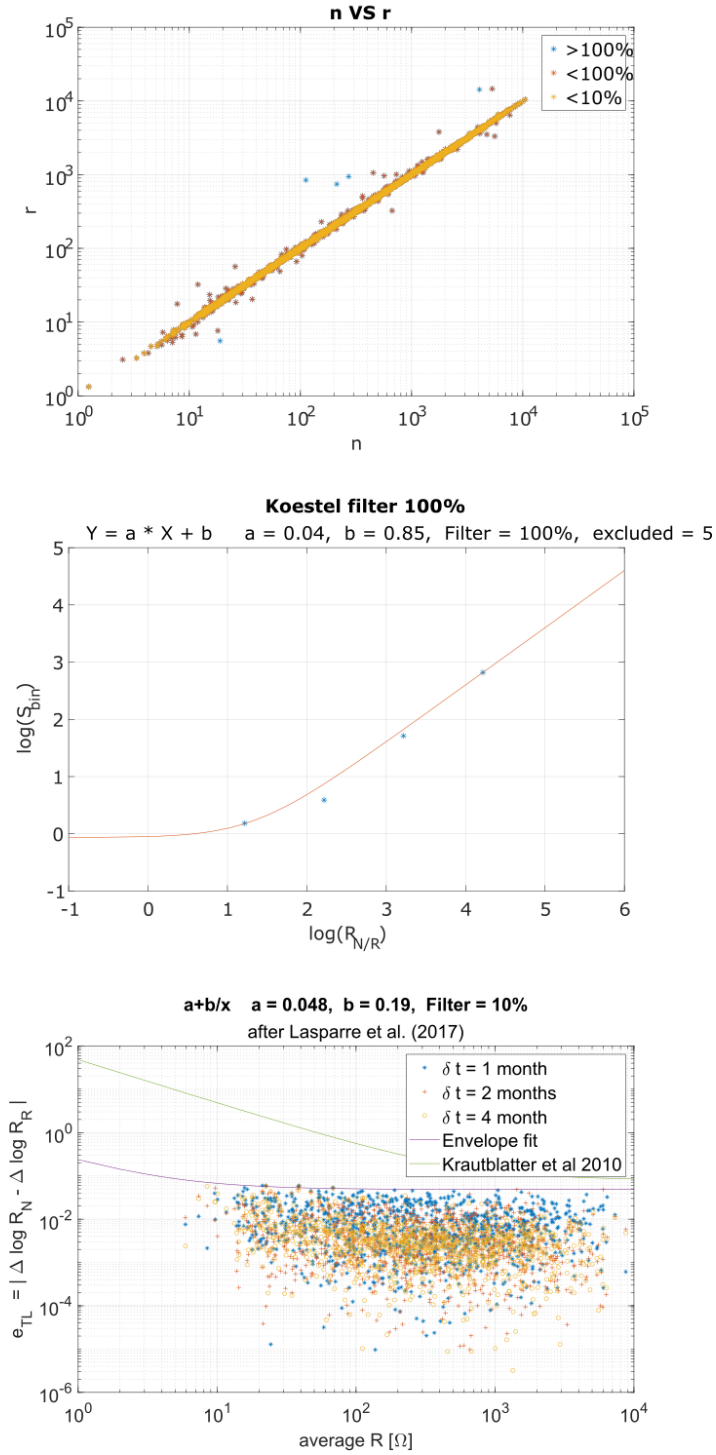

**Figure S9.** Other Error models. Upper Figure: Normal vs reciprocal measurements. Middle Figure: Error modeling according to Koestel et al. (2008). Lower Figure: Error modeling after Lasparre et al. (2017).

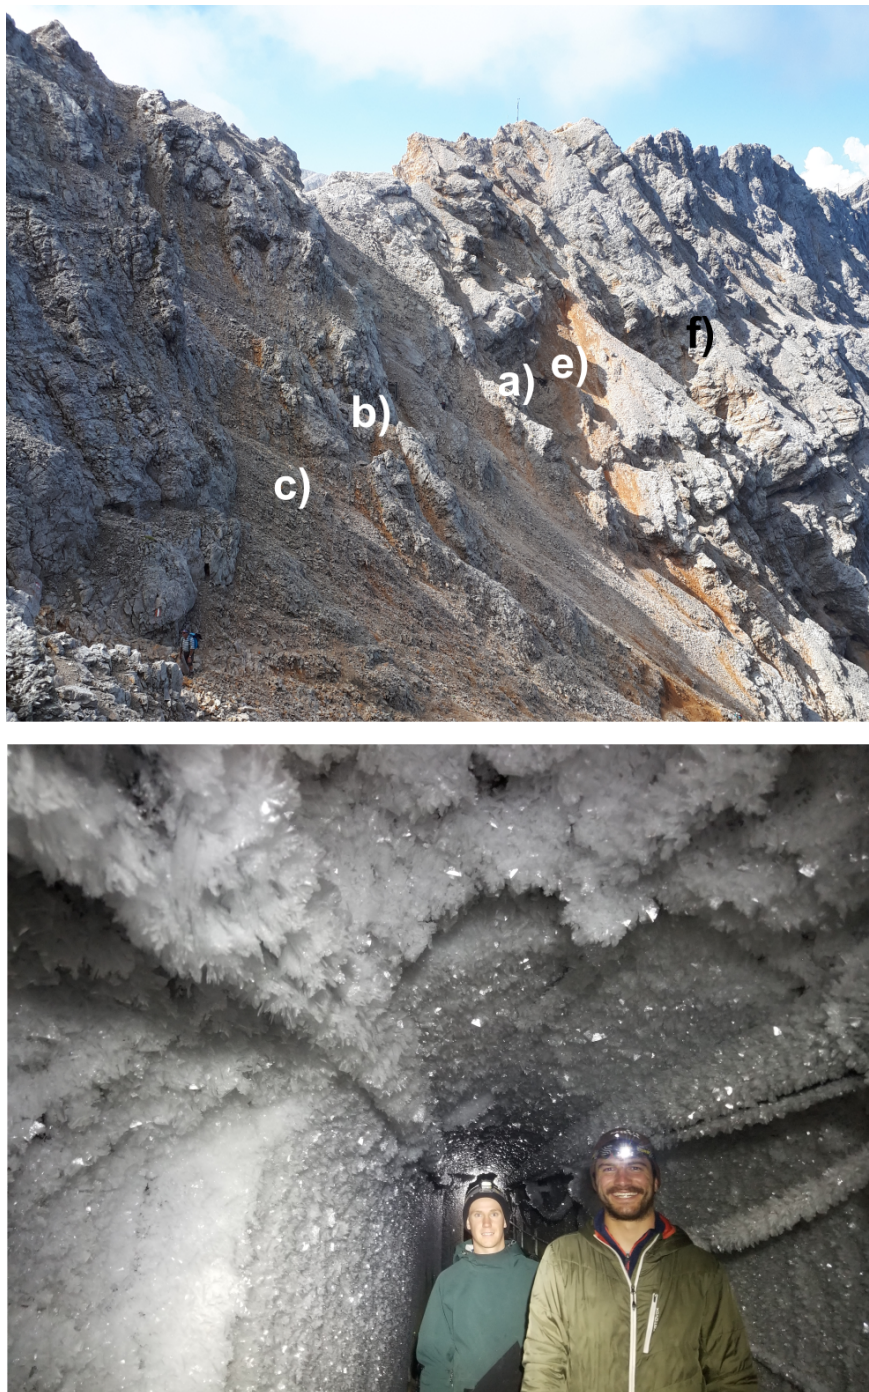

**Figure S10.** Upper image: External view of the area outside the tunnel. The letters represent the features shown in Figure 8a. Lower image: Internal view of the temporary frozen area (b).
